# Supplementary material for: Three-dimensional imaging of the extracellular matrix and cell interactions in the developing prenatal mouse cornea
Source: PubMed Central journal article supplement (PMC6677755; doi:10.1038/s41598-019-47653-z), 2019-08-02
Supplement: 41598_2019_47653_MOESM1_ESM.pdf [file 41598_2019_47653_MOESM1_ESM.pdf]

# **Three-dimensional imaging of the extracellular matrix and cell interactions in the developing prenatal mouse cornea**

Eleanor M. Feneck, Philip N. Lewis, Keith M. Meek

Structural Biophysics Research Group, School of Optometry and Vision Sciences, Cardiff University, Maindy Road, Cardiff, CF24 4HQ, UK

Corresponding author; Professor Keith Meek – [meekkm@cardiff.ac.uk](mailto:meekkm@cardiff.ac.uk)

## Supplementary videos

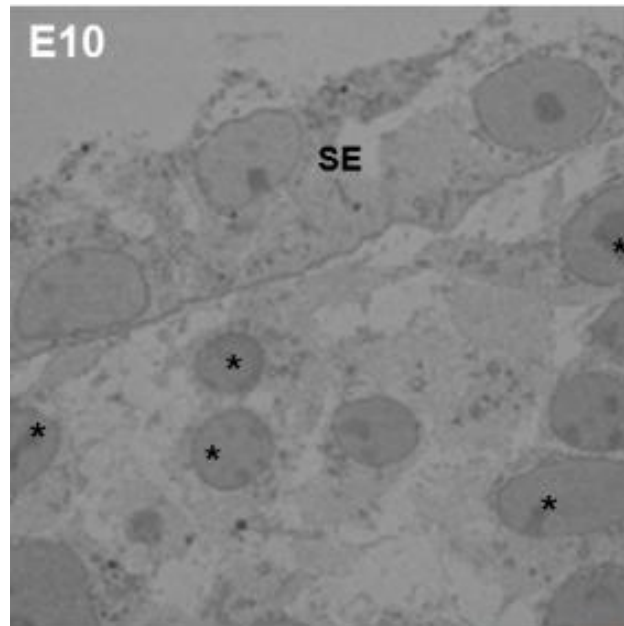

**Supplementary Video 1.** A video of the 3-D reconstructions of the E10 SBF-SEM dataset between the surface ectoderm (SE) and migrating neural crest cells (black asterisks).

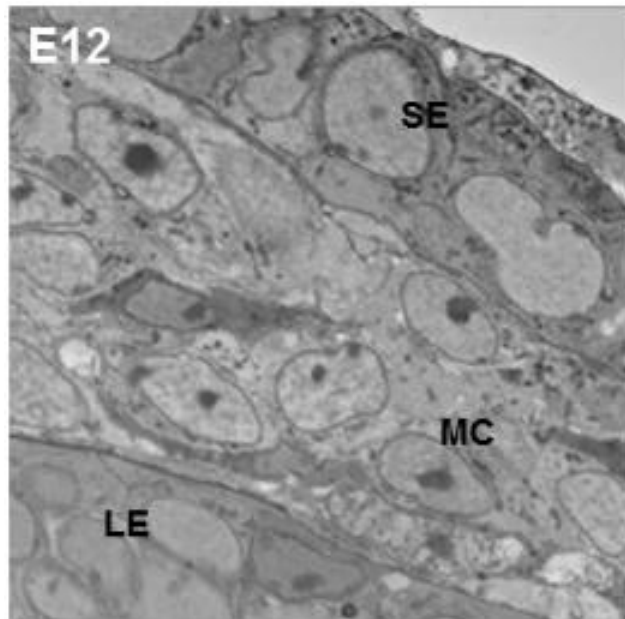

**Supplementary Video 2.** A video of the 3-D reconstructions of the E12 SBF-SEM dataset of the mesenchymal cells (MC) between the surface ectoderm (SE) and lens epithelium (LE).

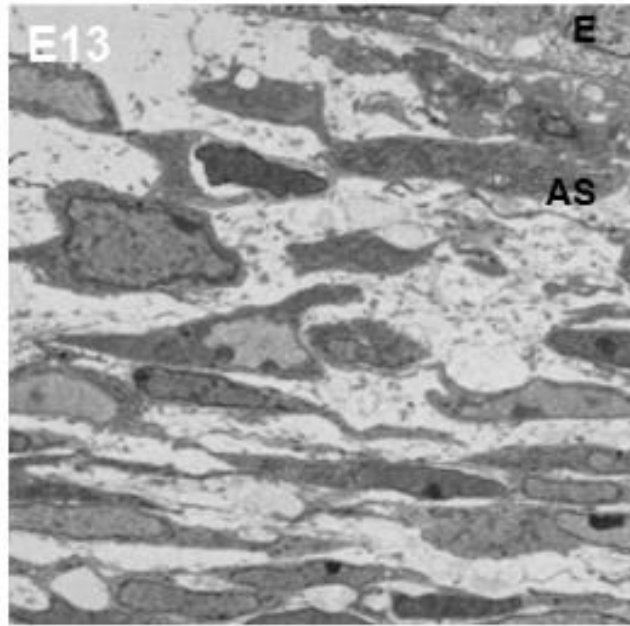

**Supplementary Video 3.** A video of the 3-D reconstructions of the E13 SBF-SEM dataset within the anterior corneal stroma (AS). Epithelium (E).

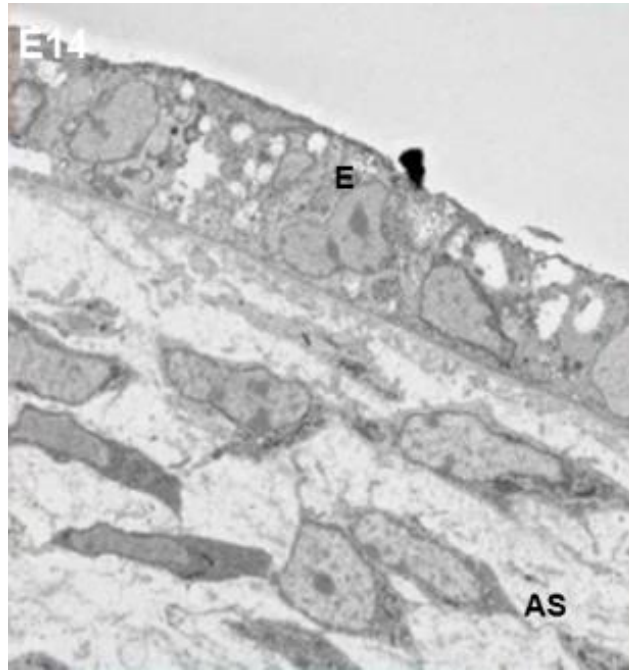

**Supplementary video 4.** A video of the 3-D reconstructions from the E14 SBF-SEM dataset of the corneal epithelium (E) and anterior corneal stroma (AS).

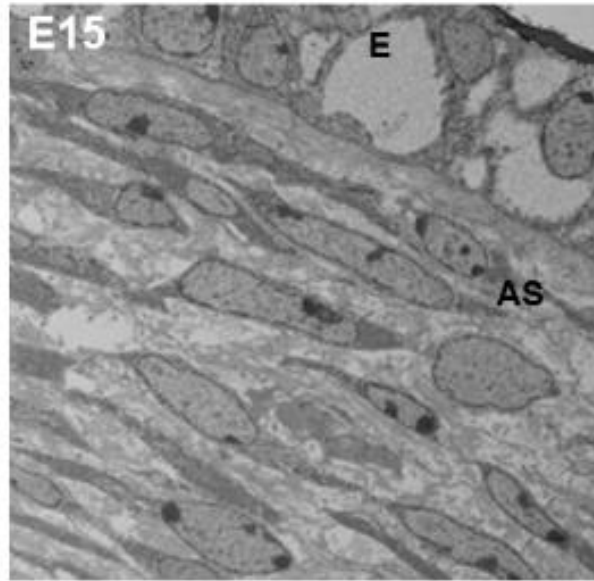

**Supplementary video 5.** A video of the 3-D reconstructions from the E15 SBF-SEM dataset of the corneal epithelium (CE) and anterior stroma (AS).
